## Aging causes decreased resistance to multiple stresses and a failure to activate specific stress response pathways

Dylan J. Dues<sup>1\*</sup>, Emily K. Andrews<sup>1\*</sup>, Claire E. Schaar<sup>1\*</sup>, Alexis L. Bergsma<sup>1</sup>, Megan M. Senchuk<sup>1</sup>, and Jeremy M. Van Raamsdonk<sup>1,2,3</sup>

<sup>1</sup>Laboratory of Aging and Neurodegenerative Disease, Center for Neurodegenerative Science, Van Andel Research Institute, Grand Rapids, MI 49503, USA

<sup>2</sup>Department of Translational Science and Molecular Medicine, Michigan State University, Grand Rapids, MI 49503, USA

<sup>3</sup>Department of Genetics, Michigan State University, East Lansing, MI 48824, USA

\*Equally contributed to this work

**Key words:** aging, stress resistance, *C. elegans*, hormesis, induced thermotolerance, heat shock response

**Received:** 11/24/15; **Accepted:** 03/17/16; **Published:** 04/05/16

**Correspondence to:** Jeremy M. Van Raamsdonk, PhD; **E-mail:** [jeremy.vanraamsdonk@vai.org](mailto:jeremy.vanraamsdonk@vai.org)

**Copyright:** Dues et al. This is an open-access article distributed under the terms of the Creative Commons Attribution License, which permits unrestricted use, distribution, and reproduction in any medium, provided the original author and source are credited

**Abstract:** In this work, we examine the relationship between stress resistance and aging. We find that resistance to multiple types of stress peaks during early adulthood and then declines with age. To dissect the underlying mechanisms, we use *C. elegans* transcriptional reporter strains that measure the activation of different stress responses including: the heat shock response, mitochondrial unfolded protein response, endoplasmic reticulum unfolded protein response, hypoxia response, SKN-1-mediated oxidative stress response, and the DAF-16-mediated stress response. We find that the decline in stress resistance with age is at least partially due to a decreased ability to activate protective mechanisms in response to stress. In contrast, we find that any baseline increase in stress caused by the advancing age is too mild to detectably upregulate any of the stress response pathways. Further exploration of how worms respond to stress with increasing age revealed that the ability to mount a hormetic response to heat stress is also lost with increasing age. Overall, this work demonstrates that resistance to all types of stress declines with age. Based on our data, we speculate that the decrease in stress resistance with advancing age results from a genetically-programmed inactivation of stress response pathways, not accumulation of damage.

### INTRODUCTION

In order to survive in a changing environment, animals must be able to respond to stresses encountered. However, activation of stress responses requires energy, and thus comes at a cost. Accordingly, animals have evolved inducible stress-responsive pathways allowing for the upregulation of stress responsive factors only upon exposure to stress. Multiple pathways have evolved to protect different compartments of the cell and to protect against different types of stresses (see

Supplemental Text for full description of stress response pathways).

The heat shock response (HSR), which is also known as the cytosolic unfolded protein response, is activated in response to heat stress or other insults that disrupt protein folding in the cytoplasm. The HSR involves upregulation of various chaperones or heat shock proteins that act to restore proteostasis to the cytosol. The HSR is regulated by the heat shock factor (HSF-1) [1, 2] and can be monitored using the *Phsp-16.2::GFP*

reporter strain [3, 4]. Similarly, the mitochondrial unfolded protein response (mitoUPR) [5, 6] and the endoplasmic reticulum unfolded protein response (ER-UPR) [7, 8] respond to unfolded or misfolded proteins in the mitochondria or endoplasmic reticulum, respectively. Activation of the mitoUPR can be monitored with the *Phsp-6::GFP* reporter strain [9], while *Phsp-4::GFP* worms have been used as a reporter for the ER-UPR [10].

The hypoxia response is activated under conditions of low oxygen levels (0.5%-1% oxygen) and is mediated by the HIF-1 transcription factor [11]. The promoter from the HIF-1 target gene *NHR-57* has been used to generate a reporter strain for the hypoxia response (*Pnhr-57::GFP*) [12]. SKN-1 is the worm homolog of mammalian Nrf (nuclear factor erythroid related factor) proteins and has an important role in responding to oxidative stress [13]. The SKN-1-mediated oxidative stress response involves upregulation of enzymes involved in Phase II detoxification, including GST-4 and GCS-1 [14]. Reporter strains for both of these genes (*Pgst-4::GFP*, *Pgcs-1::GFP*) have been used to measure the SKN-1-mediated oxidative stress response [15, 16]. DAF-16 is a FOXO transcription factor that responds to various stresses. Activation of the DAF-16-mediated stress response can be monitored by examining DAF-16:GFP nuclear localization in *Pdaf-16::daf-16::GFP* worms [17]. One of the transcriptional targets of DAF-16 is the antioxidant enzyme SOD-3 whose expression can be monitored using a *Psod-3::GFP* reporter strain [18].

In this work, we use a panel of stress-responsive reporter strains to comprehensively characterize the relationship between stress resistance and aging. We show that resistance to several types of stress declines with age, but that this does not result from a detectable increase in internal stress levels. Instead, we find that the decrease in stress resistance is associated with a decreased ability to activate specific stress response pathways. In addition, we examine the role of DAF-16 and HSF-1 in activating stress responses with increasing age. We find that HSF-1 is required for induced thermotolerance to occur, while DAF-16 is needed to maintain induced thermotolerance with age.

## RESULTS

### Resistance to multiple stresses peaks during early adulthood and decreases with age

In order to define the relationship between stress resistance and aging, we examined resistance to osmotic stress, heat stress, anoxia, oxidative stress, and bacterial

pathogenicity in wild-type worms of different ages (day 1, day 3, day 5, day 8 and day 12 of adulthood). For the osmotic stress assay, worms were transferred to plates containing 400 mM NaCl and survival was measured after 48 hours. We found that peak osmotic stress resistance occurred on day 1 and 3 of adulthood, after which there was a progressive decline (Fig 1A). Resistance to heat stress was quantified by exposing worms, which are normally grown at 20°C, to 37°C heat, and assessing survival over 8 hours. In this assay, optimal survival was exhibited by worms on days 1-5 of adulthood, followed by decreased survival in older worms (Fig 1B). Similarly, survival of worms after two days of anoxia was greatest on days 1-5 of adulthood, with decreased survival on days 8 and 12 (Fig 1C). Oxidative stress resistance was assessed using 2 mM paraquat (PQ), 4 mM PQ or 240 µM juglone. Both PQ and juglone act to increase intracellular superoxide levels through redox cycling. In each case, peak stress resistance was observed on day 3 of adulthood (Fig 1D-F). In contrast to other assays, day 1 adult worms showed the greatest sensitivity to the acute oxidative stress induced by juglone. In fact, the survival of day 1 worms was worse than 12 day old worms (See Discussion).

Finally, we assessed resistance to bacterial pathogens using *P. aeruginosa*. We performed a toxin-based assay in which killing is caused by a toxin released by the bacteria, and an ingestion-based assay where death is caused by bacterial colonization of the intestine [19]. In the toxin-based assay, we found that stress resistance was greatest at day 1 of adulthood and declined with age (Fig 1G). In the ingestion-based assay, we observed more subtle differences. We found that survival was decreased on day 5 and day 8, then increased to day 12 (Fig 1H). It is likely that the increased survival in day 12 worms results from the fact that these worms are consuming less bacteria at this age [20]. Our observation of decreased resistance to bacterial pathogen stress is consistent with a previous report in which survival on *P. aeruginosa* declined from day 3 to day 9 of adulthood [21]. The previous report shows a more dramatic decline with age, which is similar to what we observed with the toxin-based assay.

Thus, for each type of stress assayed we found that peak stress resistance occurred early in adulthood, between day 1 and day 5, followed by decreasing stress resistance with increasing age. As *C. elegans* produce almost all of their progeny before day 5 of adulthood, it would be evolutionarily advantageous to invest energy into stress resistance until this time point to allow the worm to survive until they have reproduced.

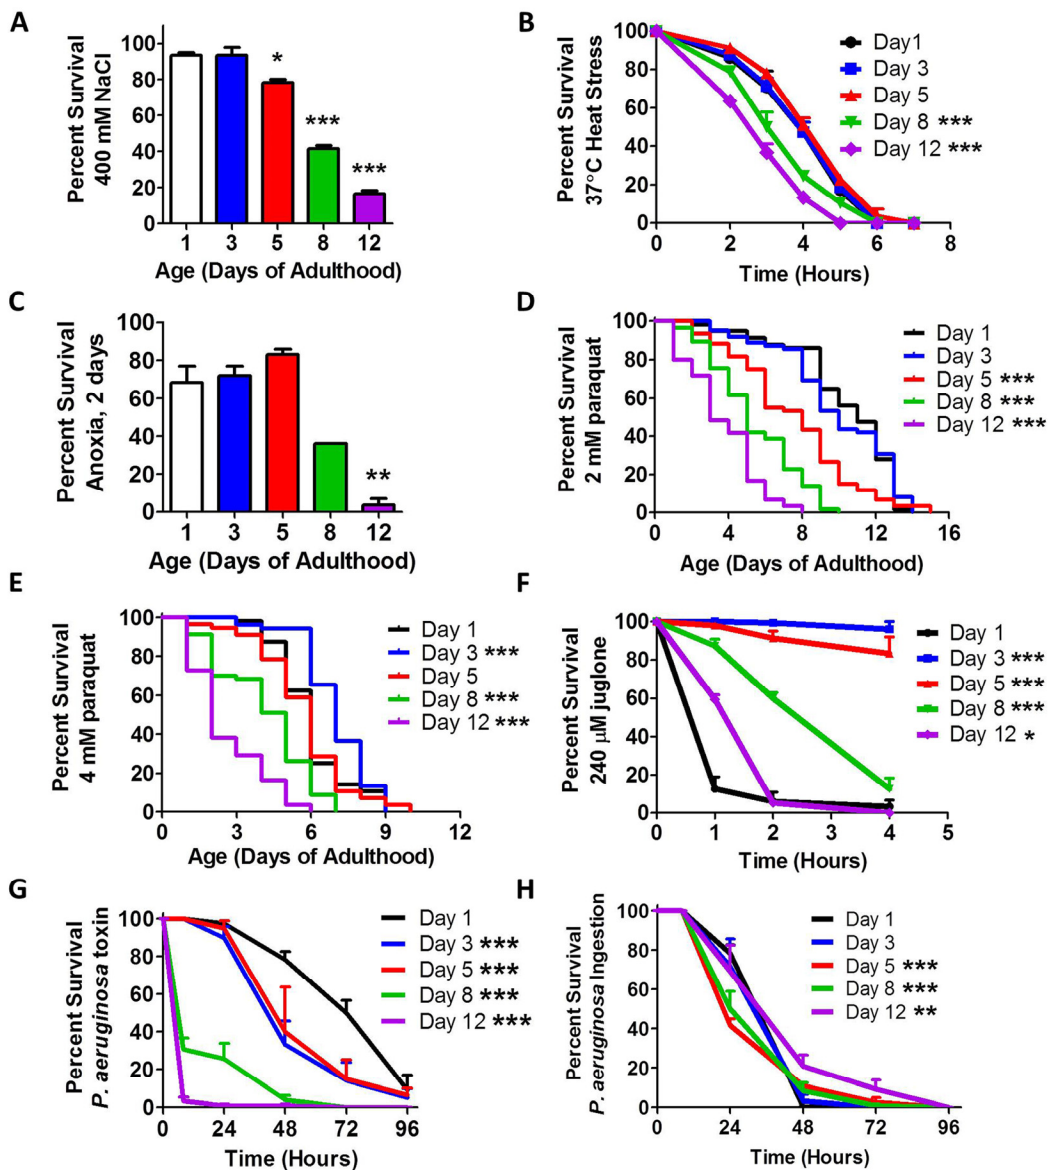

**Figure 1. Stress resistance declines with age.** Synchronized populations of wild-type worms were aged to 1, 3, 5, 8 and 12 days of adulthood on plates containing 25 μM FUDR. All ages were assayed together at the same time. Multiple types of stress resistance were measured including (A) osmotic stress, (B) heat stress, (C) anoxia, (D-F) oxidative stress and (G,H) exposure to pathogenic bacteria. For all types of stress measured, peak resistance to stress occurred during early adulthood and declined with age. Error bars indicate SEM. \* $p < 0.05$ , \*\* $p < 0.01$ , \*\*\* $p < 0.001$ .

### Aging does not increase stress sufficiently to induce stress-responsive reporters

To explore the mechanism by which stress resistance decreases with age, we sought to determine if the aging process causes a measurable amount of stress, that when combined with an external stress, leads to decreased survival. For this purpose, we used fluorescent reporter strains that respond to different types of stresses and measured activation of these reporters with increasing

age. We used *Phsp-16.2::GFP* worms to measure the HSR, *Phsp-6::GFP* worms to measure the mitoUPR, *Phsp-4::GFP* worms to measure the ER-UPR, *Pgst-4::GFP* and *Pgcs-1::GFP* worms to measure the SKN-1-mediated oxidative stress response, *Pnhr-57::GFP* worms to measure the HIF-1-mediated hypoxia response, and *Pdaf-16::daf-16::GFP* and *Psod-3::GFP* worms to measure the DAF-16-mediated stress response (DAF-16 responds to multiple types of stress) (see Supplemental Text for a summary of reporter strains used).

**Table 1. Stress-responsive reporter strains are activated by multiple types of stress**

|                      | Heat | Cold | Osmotic | Anoxia | Oxidative | Starvation | ER | Bacteria |
|----------------------|------|------|---------|--------|-----------|------------|----|----------|
| <i>Phsp-6.2::GFP</i> | ++   | -    |         | ++     |           |            | -  | +        |
| <i>Phsp-6::GFP</i>   |      | -    |         | -      | ++        | -          |    |          |
| <i>Phsp-4::GFP</i>   | ++   | -    |         |        | -         | -          | ++ |          |
| <i>Pgst-4::GFP</i>   | -    | -    | ++      | -      | ++        | -          |    | ++       |
| <i>Pgcs-1::GFP</i>   |      | -    | ++      | -      | ++        | -          | -  | +        |
| <i>Pnhr-57::GFP</i>  | +    |      |         | +      | ++        |            | +  | +        |
| <i>Pdaf-16::GFP</i>  | Yes  | No   | No      | Yes    | Yes       | Yes        | No | Yes      |
| <i>Psod-3::GFP</i>   | +    | +/-  |         |        | +         |            |    | +        |

Fluorescent reporter strains were exposed to a variety of stresses to determine which types of stress could activate each reporter strain. + significantly increased fluorescence in response to stress. ++ markedly increased fluorescence in response to stress (i.e. clear difference without quantification). – decreased fluorescence in response to stress. +/- increased in some regions but decreased in others. Three biological replicates were performed with similar results each time.

Before testing the activation of each reporter strain with age, we first wanted to determine which types of stress could activate each reporter and whether the reporters could be activated by multiple stresses. We exposed each reporter strain to eight different stresses: heat, cold, osmotic, anoxia, oxidative, starvation, ER, and bacterial pathogen stress. We found that many of the stress reporters were activated by multiple stresses (Fig S1-S8, Table 1). As expected, the HSR reporter *Phsp-16.2::GFP* was activated by heat stress [4], but was also induced by anoxia and mildly by a bacterial pathogen. The mitoUPR reporter *Phsp-6::GFP* was only activated by oxidative stress [22], while the ER-UPR reporter *Phsp-4::GFP* was induced by ER stress (exposure to tunicamycin) [9] and by heat [9, 23]. The *Pgst-4::GFP* and *Pgcs-1::GFP* reporters were activated by oxidative stress [15, 24] and bacterial pathogens [25]. Surprisingly, these reporters were also robustly activated by osmotic stress. The hypoxia reporter *Pnhr-57::GFP* was induced by oxidative stress [26, 27] and mildly by anoxia [28], heat, ER-stress and bacterial pathogen. The activation of the *Pdaf-16::daf-16::GFP* reporter was monitored by nuclear localization of DAF-16:GFP as DAF-16 enters the nucleus under stress. We found that heat stress [17], anoxia, oxidative stress [17], starvation [17] and bacterial pathogen stress all induced nuclear localization of DAF-16. Finally, we found that the *Psod-3::GFP* reporter was activated by heat stress, cold stress, oxidative stress [9, 29], and bacterial pathogens. Combined this indicates that multiple types of stress can activate these stress reporter strains, and using all of these reporters we have the ability to detect the presence of each type of stress tested.

Having shown that the reporter strains can respond to stress, we next examined reporter activity with increasing age, to determine if the natural aging process

elevates stress sufficiently to activate any of these different stress responses. For this purpose, we examined worms at day 1, day 6 and day 10 of adulthood. In this experiment, worms were grown without FUDR. We found that none of the unfolded protein responses (HSR, mitoUPR, ER-UPR) were induced in aged worms (Fig 2A-C, Fig S9-11). The *Pgst-4::GFP* and *Pgcs-1::GFP* reporters both showed decreased fluorescence at older ages (Fig 2D,E, Fig S12-15). The hypoxia reporter also showed no increase with age aside from autofluorescence (Fig 2F, Fig S16). We observed an increase in *Pdaf-16::daf-16::GFP* reporter expression at day 6 of adulthood, but did not observe any nuclear localization with increased age, suggesting that there is not an increase in DAF-16 activation because it remains cytoplasmic (Fig 2G-I, Fig S17). Finally, we observed increased fluorescence of the *Psod-3::GFP* reporter in aged worms (Fig 2H, Fig S18). The increase in fluorescence that we observed in *Psod-3::GFP* appeared to result from a differential expression pattern during aging: in young worms GFP expression is primarily in the head with some expression in the tail, while in older worms the brightest fluorescence occurs around the vulva (Fig 2K). Thus, it is possible that the observed increase in fluorescence levels in these worms results from a change in expression pattern rather than activation. This conclusion is consistent with our observation that DAF-16 expression is increased but not activated. In support of this conclusion, others have previously looked at *sod-3* reporter activity from day 5 to day 15 and not observed any increase in activation with advancing age [30]. Overall, the lack of induction of the stress-responsive reporter strains with age suggests that any increase in internal stress that occurs with age is too mild to activate a stress response. Alternatively, it is possible that the ability to respond to stress decreases with age.

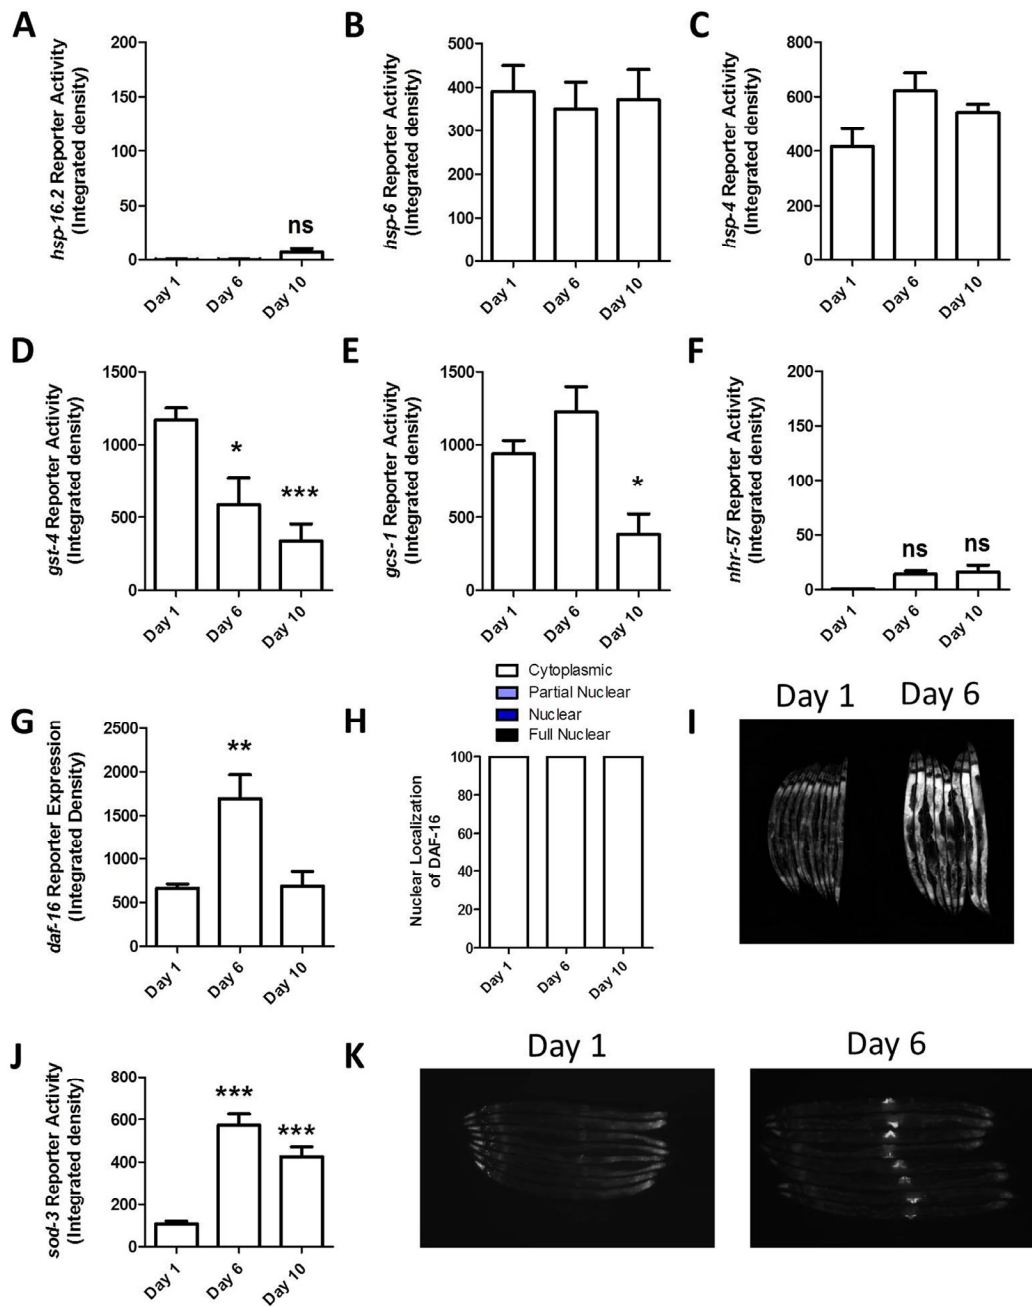

**Figure 2. Stress-responsive reporters are not activated with increasing age.** To determine whether different stress response pathways are activated with increasing age, we examined fluorescence in stress-responsive reporter strains at day 1, day 6 and day 10. None of unfolded protein response reporter strains showed increased activity with age (A-C). The two reporters for the SKN-1 mediated oxidative stress response both showed decreased fluorescence with age (D,E). The hypoxia reporter also showed no increase with age (F). The DAF-16 reporter exhibited increased expression at day 6 (G) but not increased activation as measured by nuclear localization (H,I). Finally, the SOD-3 reporter showed increased fluorescence at both day 6 and 10 (J). This increase appeared to be due to a change in expression pattern with increased expression around the vulva (K). These results suggest that any increase in internal stress that occurs with increasing age is insufficient to activate these stress-responsive pathways and or that the stress-responsive lose their ability to respond with age. Note that the mild increase in fluorescence in *Phsp-16.2::GFP* and *Pnhr-57::GFP* worms is due to autofluorescence. Error bars indicate SEM. ns = not significant. \* $p < 0.05$ , \*\* $p < 0.01$ , \*\*\* $p < 0.001$ .

## The ability to induce specific stress response pathways declines with age

To determine the extent to which the ability to respond to stress declines with age, we determined the optimal dose of stress for inducing each stress-responsive reporter strain (Table 2), and then exposed the reporter strains to this stress at day 1, day 6 and day 10 of adulthood. The

ability to induce the HSR was maintained throughout adulthood (Fig 3A, Fig S9). In contrast, the mitoUPR showed decreased effectiveness with age, such that by day 10 of adulthood worms no longer activated the mitoUPR in response to oxidative stress (Fig 3B, Fig S10). The ER-UPR remained functional throughout adulthood, though the magnitude of induction appeared to be reduced at the oldest time point (Fig 3C, Fig S11).

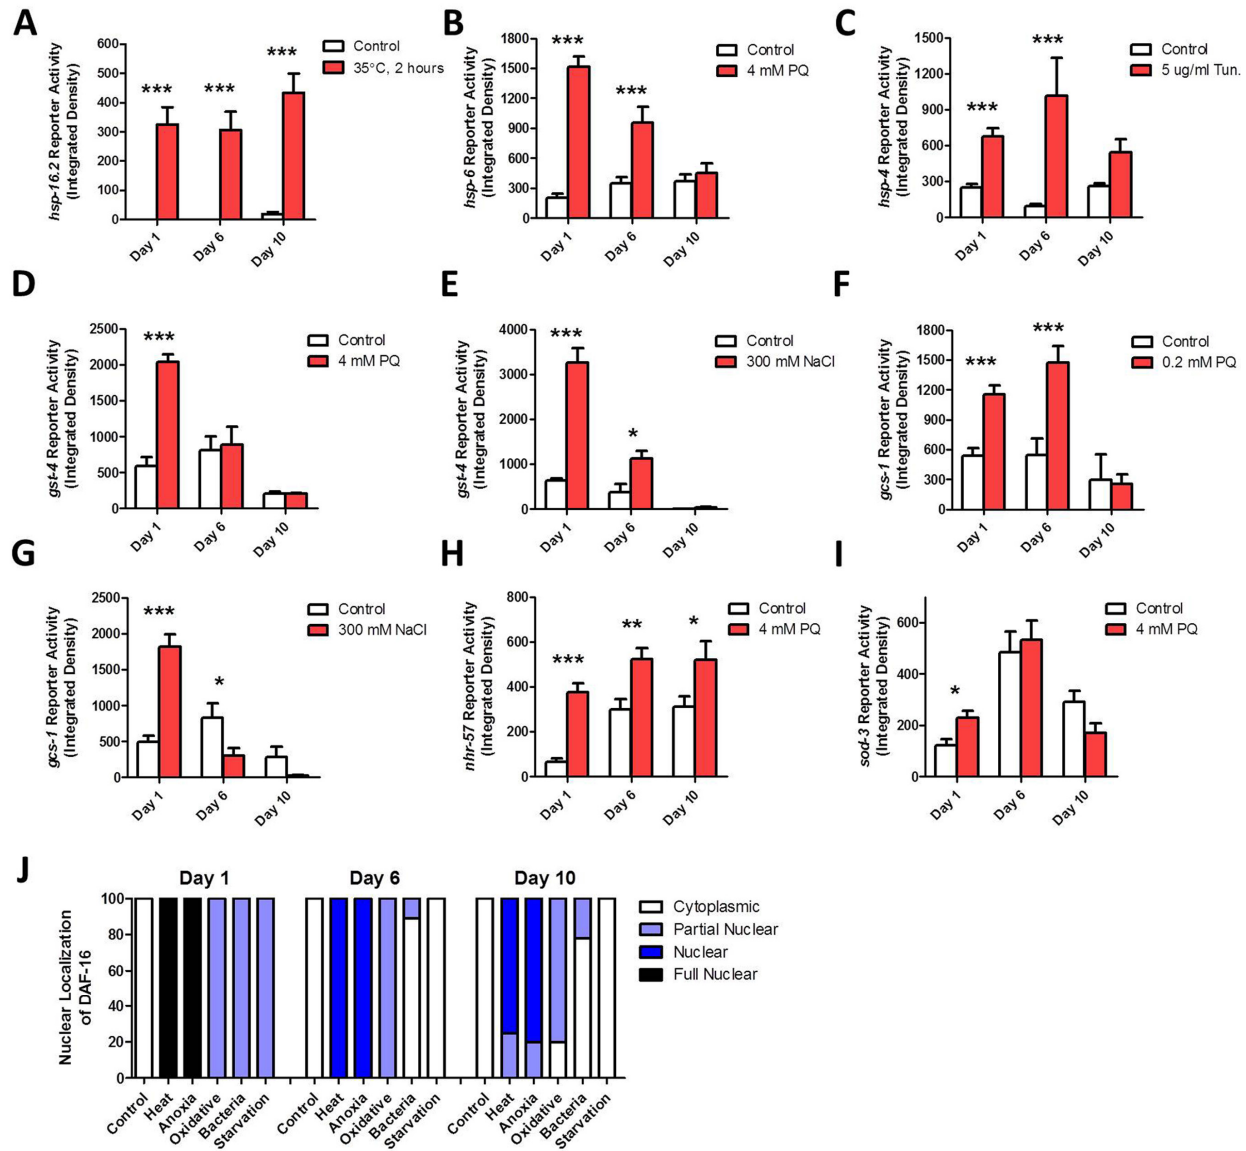

**Figure 3. Specific stress-responsive pathways fail to respond to stress with advancing age.** To examine the effect of aging on the ability of specific stress-responsive pathways to become activated, we used fluorescent reporter strains and exposed worms to stress at increasing ages. The *Pgst-4::GFP* (D,E), *Pgcs-1::GFP* (F,G) and *Phsp-6::GFP* (B) reporter strains showed a decreased ability to respond to stress with increasing age such that by day 10 of adulthood there was no induction in response to stress. The *Psod-3::GFP* (I) reporter strain also failed to respond to stress on day 10 of adulthood. In contrast, the *Phsp-16.2::GFP* (A), *Phsp-4::GFP* (C), and *Pnhr-57::GFP* (H) reporter strains all maintained their ability to respond to stress until day 10 of adulthood. (J) Nuclear localization of DAF-16 could be induced by heat stress (35°C, 2 hours), anoxia (24 hours) and oxidative stress (4 mM PQ, 2 days) at all ages. Both bacterial pathogen exposure (*P. aeruginosa*) and starvation (2 days) showed a decreased ability to cause nuclear localization of DAF-16 with increasing age. Error bars indicate SEM. \*p<0.05, \*\*p<0.01, \*\*\*p<0.001.

As both oxidative and osmotic stress were equally effective at activating the *Pgst-4::GFP* and *Phsp-4::GFP* reporter strains, we examined the ability of these reporters to respond to both types of stress with increasing age. We found that neither type of stress was able to activate either of the reporters at day 10, indicating that the SKN-1-mediated oxidative stress response is lost with age (Fig 3D-G, Fig S12-15). The hypoxia response could be induced at all three time points, though the magnitude was decreased at day 10 (Fig 3H, Fig S16) The *Psod-3::GFP* reporter could be activated at day 1 of adulthood but not at day 6 or day 10 (Fig 3I, Fig S18).

Finally, the ability of stress to induce the nuclear localization of DAF-16:GFP was tested using five different stresses. We found that heat and anoxia caused strong nuclear localization of DAF-16:GFP at all ages (Fig 3J, Fig S17). Oxidative stress caused weak nuclear localization of DAF-16 at all ages, while starvation and exposure to bacterial pathogens only induced nuclear localization of DAF-16:GFP on day 1 of adulthood (Fig 3J, Fig S17). Note that the latter result may be at least partially due to the fact that older worms eat less than younger worms [20]. This would result in less exposure to bacterial pathogen and the difference in consumption between normal eating and starvation would be much less than in early adulthood. Thus, while the reporters for the mitoUPR, SKN-1-mediated oxidative stress response and antioxidant response (*Pgst-4::GFP*, *Pgcs-1::GFP*, *Phsp-6::GFP*, *Psod-3::GFP*) lose their ability to respond to stress with increasing age, the reporters for the ER-UPR, hypoxia response and DAF-16-mediated stress response (*Phsp-4::GFP*, *Pnhr-57::GFP*, *Pdaf-16::daf-16:GFP*) maintain their stress-responsiveness until at least day 10 of adulthood.

### The ability to induce a hormetic response to heat stress is lost with age

To further explore the mechanisms underlying the decline in stress resistance with increased age, we

examined the ability of worms to induce a hormetic response with increasing age. It has previously been shown exposing worms to a mild heat [31-35], oxidative [33, 36], osmotic [37], hypoxic [38, 39] or cold [40] stress increases their resistance to a subsequent toxic dose of the same type of stress. In addition, for heat [31, 33] and oxidative stress [26, 41-44], exposure to a mild stress was shown to increase lifespan. To determine whether other types of stress could also induce an increase in lifespan we treated wild-type worms with mild doses of six different stresses. We found that heat stress, osmotic stress, oxidative stress and cold stress could cause an increase in lifespan (Fig S19). While we did not observe increased lifespan resulting from starvation on solid plates, a previous study found that lifespan could be increased by starving worms for 1 or 2 days in S-basal liquid media [45]. As we observed the most robust increase in lifespan with heat stress, we chose to focus on the hormetic response to heat stress in our subsequent experiments.

To determine the extent to which heat stress hormesis is lost with age, we treated wild-type worms with a mild heat stress of 35°C for 2 hours at different ages. We then measured resistance to heat stress the following day and measured lifespan. We found that up until day 7 of adulthood, inclusive, that mild heat stress resulted in increased survival in the heat stress assay the following day, while at day 9 of adulthood this response was lost (Fig 4). Similarly, exposure to a mild heat stress resulted in increased lifespan up to day 7 of adulthood but not at day 9 (Fig 4). In both cases, the improvement in stress resistance or lifespan was greatest when the mild heat stress was administered on day 1 of adulthood with diminished response at older ages. Thus, although the ability to mount a hormetic response is maintained until day 7, the strength of this response is muted with increasing age. A previous study demonstrated that oxidative stress-induced hormesis using the superoxide-generator juglone is also lost with age [36].

**Table 2. Optimal stress conditions to activate stress-responsive reporter strains**

| Reporter strain       | Optimal Type of Stress | Optimal Stress Condition for Induction |
|-----------------------|------------------------|----------------------------------------|
| <i>Phsp-16.2::GFP</i> | Heat                   | 35°C, 2 hours + 20°C, 4 hours          |
| <i>Phsp-6::GFP</i>    | Oxidative              | 4 mM paraquat, 48 hours                |
| <i>Phsp-4::GFP</i>    | ER                     | 5 ug/ml tunicamycin, 24 hours          |
| <i>Pgst-4::GFP</i>    | Osmotic                | 300 mM NaCl, 24 hours                  |
| <i>Pgcs-1::GFP</i>    | Osmotic                | 300 mM NaCl, 24 hours                  |
| <i>Pnhr-57::GFP</i>   | Oxidative              | 4 mM paraquat, 48 hours                |
| <i>Pdaf-16::GFP</i>   | Heat                   | 35°C, 2 hours                          |
| <i>Psod-3::GFP</i>    | Heat                   | 35°C, 2 hours + 20°C, 24 hours         |

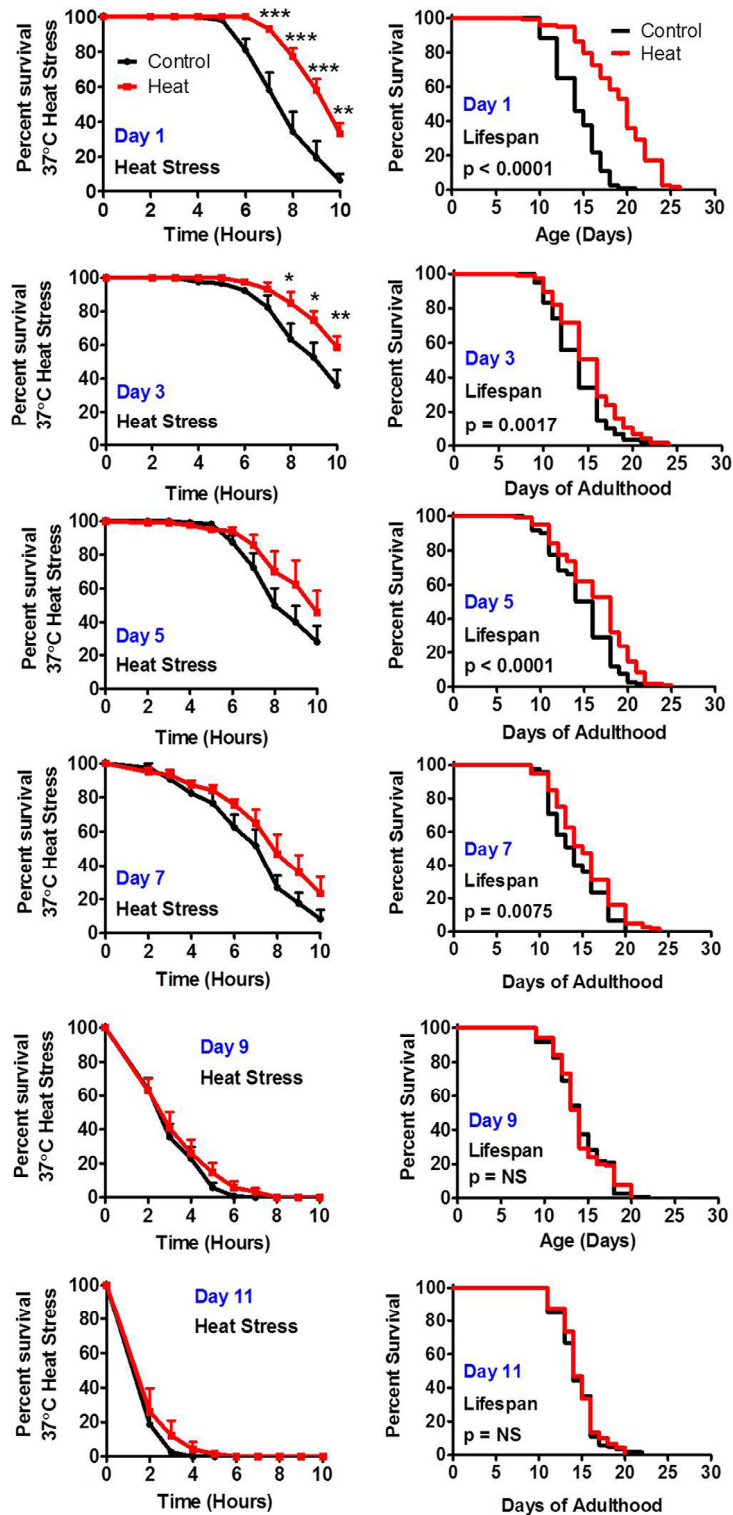

**Figure 4. The ability to respond to stress decreases with age.** Worms treated with a mild 35°C heat stress exhibit increased resistance to a subsequent more severe heat stress and increased lifespan. To determine how the ability to respond to stress changes with age, worms were exposed to a mild 35°C heat stress for 2 hours at increasing ages (Day 1, Day 3, Day 5, Day 7, Day 9 and Day 11 of adulthood). The following day worms were exposed to a 37°C heat stress while a separate group was used to measure lifespan. Worms were able to respond to heat stress by increasing resistance to heat and by increasing lifespan until day 7 of adulthood inclusive.



## A single hormetic dose of heat stress improves stress resistance for multiple days

Since a single dose of stress was able to increase lifespan, we next sought to determine how long after exposure to a mild heat stress worms are able to maintain their induced thermotolerance. We exposed wild-type worms to a mild heat stress of 35°C for 2 hours on day 1 of adulthood and then tested resistance to heat stress at increasing ages. We found that worms tested on day 2, day 4, day 6 and day 8 of adulthood exhibited increased resistance to heat stress compared to age-matched controls (Fig 5). However, by day 10 of adulthood stress resistance was equivalent to controls.

### Activation of unfolded protein responses persist for days after stress

To explain the observation that stress resistance is increased for more than a week following a single exposure to a mild heat stress, we hypothesized that this heat stress may turn on the HSR and keep it on such that the worm would be able to avoid subsequent stresses. To test this, we exposed the HSR reporter strain *Phsp-16.2::GFP* to a mild heat stress of 35°C for 2 hours on day 1 of adulthood and then measured reporter activation until day 10 of adulthood. We found that *hsp-16.2::GFP* expression was highly induced for three days and remained elevated until day 5 of adulthood (Fig 6A, Fig S20).

To determine if the mitoUPR also remains activated for multiple days following induction, we treated the mitoUPR reporter strain *Phsp-6::GFP* with 4 mM paraquat for one day and monitored reporter activity until day 10 of adulthood. We found that the *hsp-6::GFP* expression was highly induced for 5 days following oxidative stress and was still significantly increased after 7 days (Fig 6B, Fig S21). Finally, we tested the ER-UPR by treating *Phsp-4::GFP* worms with 5 µg/ml tunicamycin for one day. We found that the ER-UPR remained activated for only two days following ER stress (Fig 6C, Fig S22). Thus, the activation of unfolded protein responses persist for multiple days following an acute stress, thereby paralleling the increase in resistance to stress.

### HSF-1 is required for induced thermotolerance, while DAF-16 is needed to maintain induced thermotolerance with age

To begin to explore the role of the stress-responsive transcription factors in induced thermotolerance, and in the activation of unfolded protein responses, we focused on DAF-16 and HSF-1 using genetic mutants. For *daf-16*, we used a deletion mutant (*mu86*) in which the N-termini of all of the *daf-16* transcripts are affected and is thus believed to be a null mutant [46]. For *hsf-1*, we used a point mutant for *hsf-1*, which occurs in exon 7 of 8 and results in truncation of 86 amino acids that includes the predicted transactivation domain [47, 48].

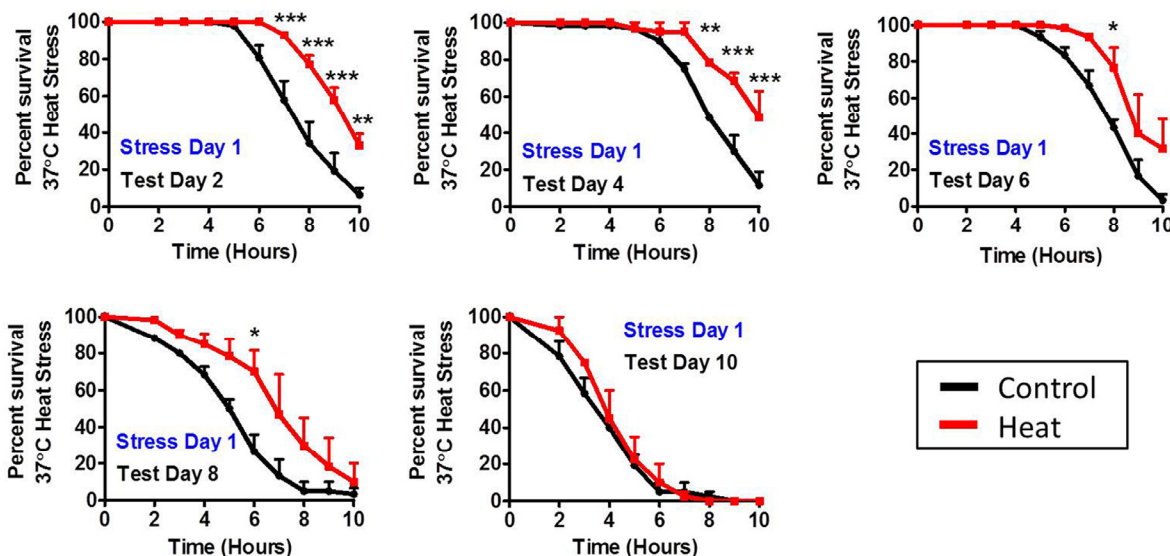

**Figure 5. Duration of induced thermotolerance persists until day 8 of adulthood.** To determine the duration of induced thermotolerance, worms were exposed to a mild 35°C heat stress for 2 hours on day 1 of adulthood. Resistance to a subsequent 37°C heat stress was then tested at increasing ages (Day 2, Day 4, Day 6, Day 8 and Day 10). Worms treated with a mild heat stress maintain increased resistance to heat stress for at least 8 days. Error bars indicate SEM. \* $p < 0.05$ , \*\* $p < 0.01$ , \*\*\* $p < 0.001$ .

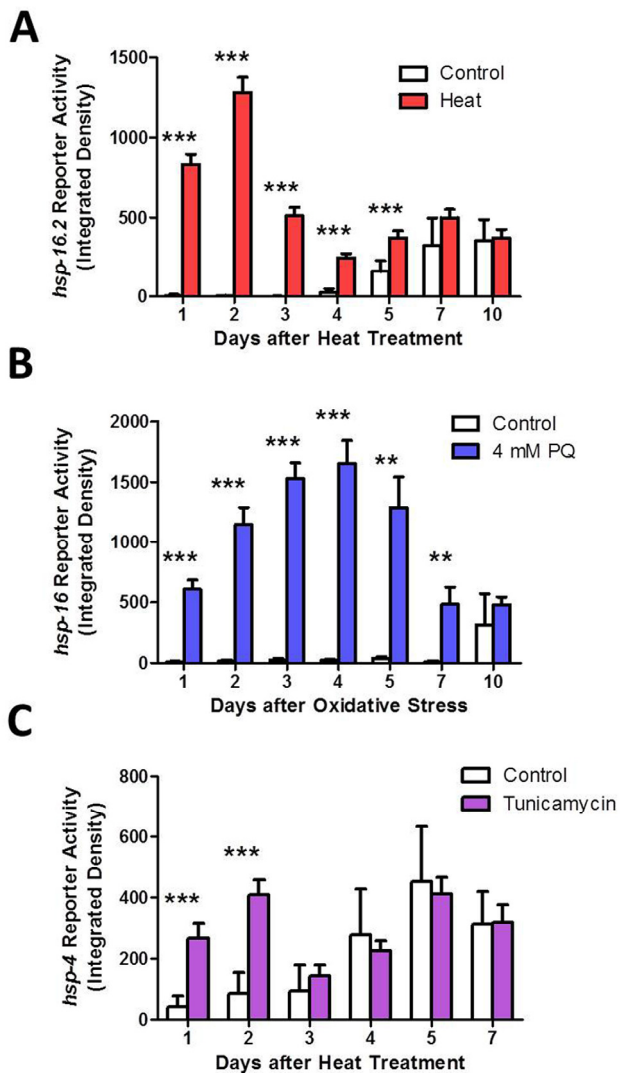

**Figure 6. Activation of heat shock response (HSR), mitochondrial unfolded protein response (mitoUPR) and endoplasmic reticulum unfolded protein response (ER-UPR) lasts for multiple days after induction.** Fluorescent reporter strains were used to monitor the activation of the HSR, mitoUPR and ER-UPR following exposure to stress on day 1 of adulthood. Fluorescent reporter activity was monitored daily. (A) The HSR, as measured by the *Phsp-16.2::GFP* reporter strain, remains activated for at least 5 days following a mild 35°C heat stress for 2 hours. (B) The mitoUPR, as measured by the *Phsp-6::GFP* reporter strain, remains active for at least 7 days following exposure to 4 mM paraquat for 1 day (oxidative stress). (C) The ER-UPR remains active for only 2 days after exposure to 5 µg/ml tunicamycin for 1 day (ER stress). Error bars indicate SEM. \* $p < 0.05$ , \*\* $p < 0.01$ , \*\*\* $p < 0.001$ .

We found that *daf-16* worms exhibited normal sensitivity to heat stress, and induced thermotolerance of *daf-16* worms was equivalent to WT (Fig 7A). This is consistent with previous reports showing normal or mildly reduced heat stress resistance in *daf-16* worms [49-52] and an ability to increase heat stress resistance following a mild heat stress [49, 52]. However, when we examined the ability of *daf-16* worms to maintain induced thermotolerance with age, we found that the increased resistance to heat stress that resulted from exposure to a mild 35°C heat stress for 2 hours on day 1 of adulthood was lost by day 4 (Fig 7C-F).

To determine if the ability to activate unfolded protein responses is affected by disrupting DAF-16, we compared the activation of the HSR, mitoUPR and ER-UPR reporters in response to 35°C heat stress, 4 mM PQ oxidative stress and 5 µg/ml tunicamycin ER stress, respectively, to WT worms on day 1 of adulthood. We found that the activation of the *Phsp-16.2::GFP*, *Phsp-6::GFP* and *Phsp-4::GFP* reporters was not diminished by the *daf-16* deletion, suggesting that DAF-16 is dispensable for the HSR, mitoUPR and ER-UPR (Fig 7G, Fig S23). Since *daf-16* mutants were unable to maintain induced thermotolerance with age, we next tested the duration of activation of the HSR and mitoUPR in response to a single stress on day 1 of adulthood. As in WT worms, we found that in *daf-16* worms a single dose of stress activates the *Phsp-16.2::GFP* HSR reporter for at least 5 days (Fig 7H, Fig S24), and the *Phsp-6::GFP* mitoUPR reporter for at least 7 days (Fig 7I, Fig S25).

Similar to previous work [52], we find that *hsf-1* mutants are able to survive a 37°C heat stress as well as WT worms (Fig 8A), but fail to exhibit induced thermotolerance (Fig 8B-F). In examining the ability of *hsf-1* mutants to activate the HSR, mitoUPR and ER-UPR on day 1 of adulthood, we found that while *hsf-1* mutants are still able to activate the *Phsp-16.2::GFP*, *Phsp-6::GFP* and *Phsp-4::GFP* reporters in response to heat, oxidative and ER stress, respectively, in each case the magnitude of activation was less than in WT worms (Fig 8G, Fig S23). Decreased upregulation of the HSF-1 target gene *hsp-16.2* in response to heat stress has previously been noted [47, 53]. Finally, we tested the duration of activation of the *Phsp-16.2::GFP* HSR and *Phsp-6::GFP* mitoUPR reporters in response to a single stress in *hsf-1* worms. We found that in *hsf-1* mutants *Phsp-16.2::GFP* reporter activity was increased for 4 days following heat stress (Fig 8H, Fig S26), whereas *Phsp-6::GFP* reporter activity was increased for 5 days (Fig 8I, Fig S27). Thus, in both cases the duration was less than in WT or *daf-16* worms.

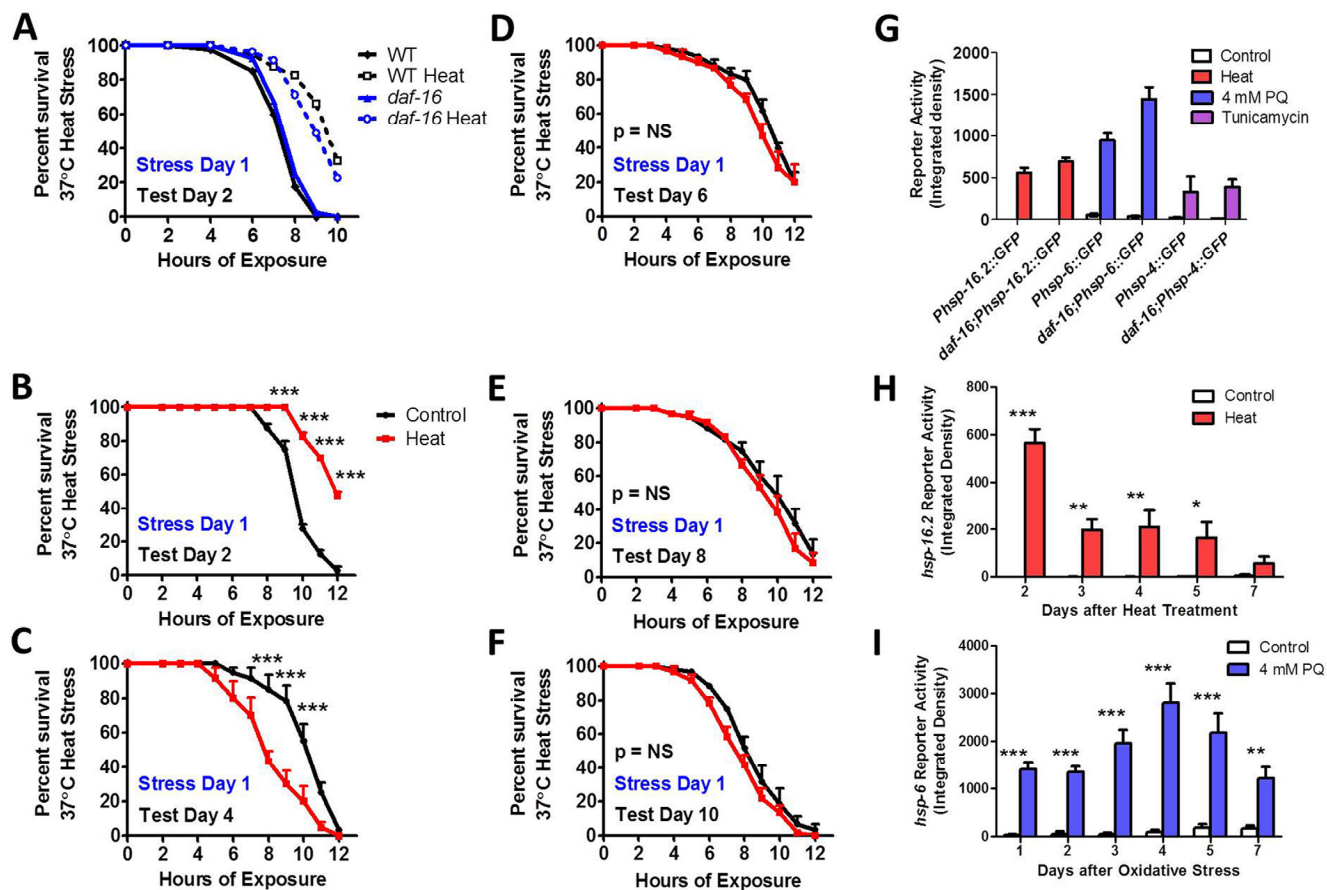

**Figure 7. DAF-16 is required to maintain induced thermotolerance.** Survival under 37°C heat stress and induced thermotolerance was equivalent between *daf-16* and WT worms (A). Although *daf-16* worms exhibit increased survival under heat stress one day after exposure to a mild 35°C heat stress for 2 hours (C), the induced thermotolerance is lost less than 3 days after the heat stress (C-F). *daf-16* worms are able to activate the HSR, mitoUPR and ER-UPR in response to heat, oxidative stress and tunicamycin, respectively, to the same extent as WT worms at day 1 of adulthood (G). As in WT worms, the HSR in *daf-16* worms, as measured by *Phsp-16.2::GFP* reporter activity, remains activated for at least 5 days following a mild 35°C heat stress for 2 hours (H). Also, similar to WT worms, the mitoUPR in *daf-16* worms, as measured by *Phsp-6::GFP* reporter activity, remains active for at least 7 days following exposure to 4 mM paraquat for 1 day (oxidative stress). Error bars indicate SEM. \**p*<0.05, \*\**p*<0.01, \*\*\**p*<0.001.

## DISCUSSION

### Resistance to stress declines with age

In this work, we examine the relationship between stress resistance and aging. We assayed six different types of stress (osmotic stress, heat stress, anoxia, oxidative stress, bacterial toxin stress and bacterial ingestion stress) and found that for every stress that we tested that stress resistance declines with age (Fig S28). For each of these stresses, the peak stress resistance occurred early in adulthood between day 1 and day 5. While the pattern of decline was similar between most assays, we noted two exceptions. First, in the acute

oxidative stress assay in which worms are exposed to juglone, we found that day 1 adult worms were the most sensitive. This may be due to increased permeability of the cuticle to juglone after the L4 to adult molt or possibility increased digestion of juglone as younger worms have a faster rate of pharyngeal pumping [52] and consume more bacteria [54]. The other exception was the bacterial pathogen assay, which tests resistance to intestinal colonization by *P. aeruginosa* bacteria (referred to elsewhere as the slow kill assay [19]). In this assay, we observed increased resistance in day 12 worms. Since this assay relies on ingestion of bacteria to induce toxicity, it is likely that the decreased rate of ingestion at day 12 [52, 54] contributes to their resistance.

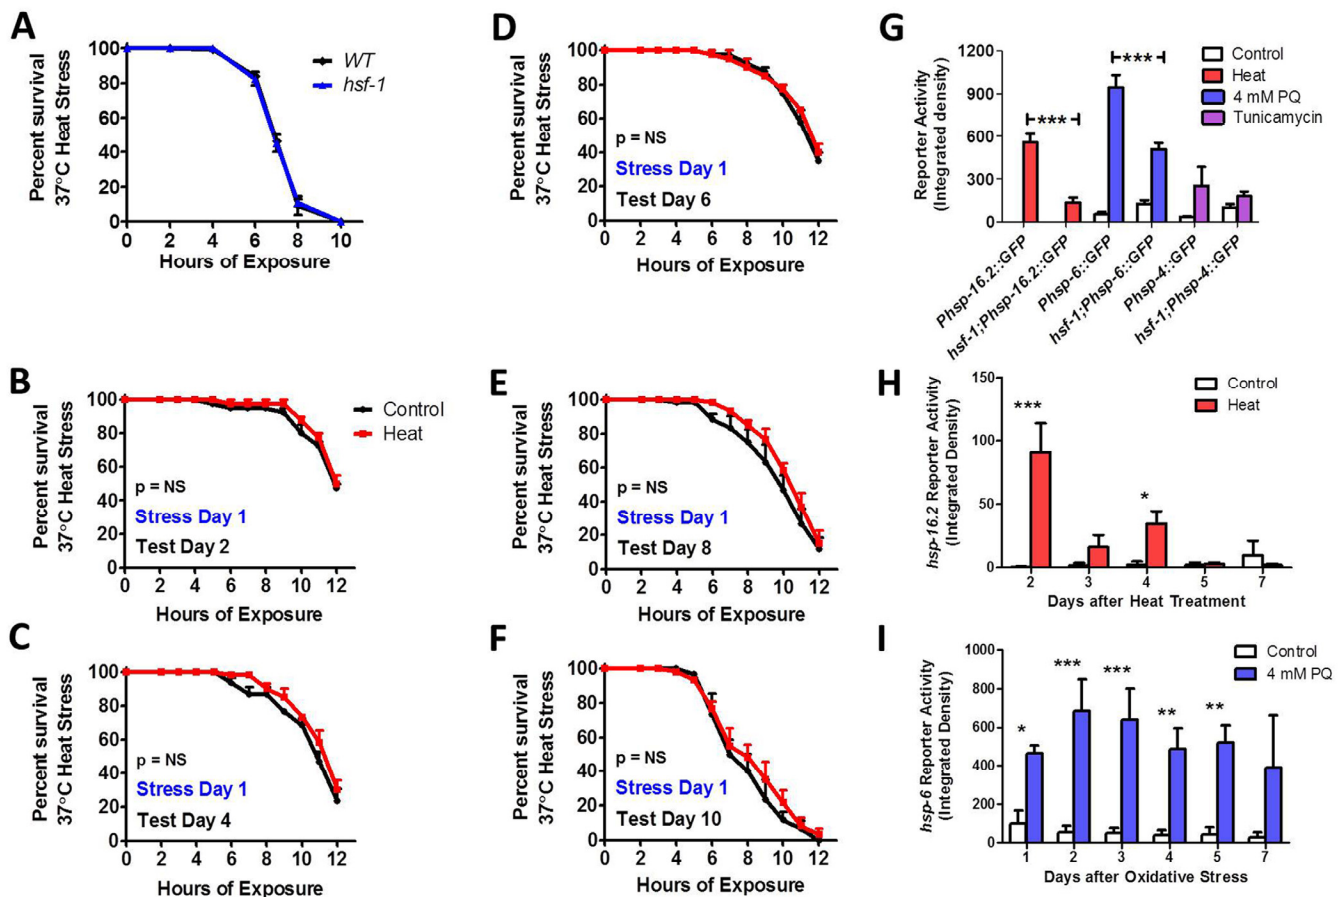

**Figure 8. HSF-1 is required for induced thermotolerance and full activation of heat shock response and mitochondrial unfolded protein response.** While *hsf-1* mutant worms show equivalent 37°C heat stress survival compared to WT worms (A), *hsf-1* mutants failed to exhibit induced thermotolerance under heat stress after exposure to a mild 35°C heat stress for 2 hours (B-F). *hsf-1* mutants are able to increase *Phsp-16.2::GFP* reporter activity in response to heat stress, but the magnitude of increase is markedly less than WT (G). Similarly, *hsf-1* mutants show decreased induction of the *Phsp-6::GFP* mitoUPR reporter in response to oxidative stress compared to WT worms (G). Once activated, the duration of the HSR, as measured by *Phsp-16.2::GFP* reporter activity, is reduced in *hsf-1* worms compared to WT (H). Similarly, the duration of the mitoUPR in *hsf-1* worms is also decreased compared to WT worms after induction with 4 mM PQ (I). Error bars indicate SEM. \* $p < 0.05$ , \*\* $p < 0.01$ , \*\*\* $p < 0.001$ .

While we were preparing our manuscript, two other groups published findings consistent with our results. Heidi Tissenbaum's group showed that resistance to both heat stress and oxidative stress decline with age [55]. In that study, worms were aged on plates containing FUDR and stress resistance was tested every 5 days. They found that resistance to heat stress and oxidative stress declined after day 5. More recently, the Morimoto lab reported that resistance to heat and oxidative stress begins to decline as early as day 1 of adulthood [21]. As this is an earlier decline than we observed or was observed by Bansal et al. [55], we wondered if the presence of FUDR could account for the differences observed, as FUDR has been shown to have

effects on longevity and stress resistance for certain strains and conditions [56-59]. To test this, we compared resistance to oxidative stress in day 2 adults on NGM plates to day 2 adults on NGM plates containing 25  $\mu$ M FUDR to day 1 adults. In agreement with our previous results, we found that day 2 adults are more resistant to juglone-induced oxidative stress than day 1 adults independent of the presence of FUDR (Fig S29). As the absence of FUDR does not account for the earlier decline in stress resistance observed by Labbadia et al., it may have resulted from differences in stress assay paradigms. For example, in our chronic oxidative stress assay involving paraquat, we do not observe increased sensitivity in day 1 adults (Fig 1).

Despite differences in assay conditions, all three studies clearly demonstrate that resistance to both oxidative stress and heat stress declines with age. Our study extends these previous results to show that anoxia resistance, and resistance to bacterial toxin stress also decline with increasing age.

### **Aging does not activate stress response pathways**

It has been proposed that accumulation of molecular damage is a primary cause of aging. For example, the free radical theory of aging suggests that oxidative damage caused by normal metabolism is a primary cause of aging [60]. Similarly, the loss of proteostasis has been proposed to be a significant driver of aging [61]. To monitor the accumulation of stress with increasing age, we used fluorescent reporter strains designed to measure a variety of stress response pathways that are known to be activated by stress conditions including disruption of proteostasis or oxidative stress. Surprisingly, we did not observe activation of any of the stress-responsive reporter strains with increasing age. Further investigation revealed that this is partly due to the fact that some of the stress responsive pathways studied lose the ability to respond to stress with increased age (mitoUPR, SKN-1-mediated oxidative stress response). In contrast, the reporter strains for the HSR, ER-UPR, hypoxia response and DAF-16-mediated stress response, were still able to respond to stress at day 10 of adulthood. This indicates that any increase in internal stress levels that occurs with age is not sufficient to activate the HSR, ER-UPR, hypoxia response or DAF-16-mediated stress response. We cannot exclude the possibility that there is a mild increase in internal stress that is not sufficient to detectably increase reporter activation. Nonetheless, these results suggest that any increase in internal stress that is present is mild.

Our observation that any damage that occurs with aging is not sufficient to activate stress-response pathways is congruent with the idea that the accumulation of molecular damage is not a primary cause of aging. In other words, although increasing damage is associated with advancing age, it does not cause aging (see multiple recent reviews [62-67]). As an alternative to the widely accepted damage accumulation theories, it has been proposed that aging results from hyperfunction [68, 69]. This theory suggests that a failure to turn off signaling pathways, such as TOR (target of rapamycin), which are required for growth and differentiation during development, has detrimental effects during adulthood [70-72]. This theory provides a plausible explanation for many existing paradoxes in aging research [73], such as why larger animals between species live longer, while within a species the opposite is true [74, 75].

### **Stress responsive pathways are activated by multiple types of stress**

In characterizing the stress-responsive reporter strains, we examined the extent to which different types of stress could activate each stress pathway. We found that most of the stress reporter strains could be activated by multiple stresses. Heat stress was able to activate both the HSR and ER-UPR, but not the mitoUPR. It is likely that elevated heat causes protein misfolding that leads to this activation, but it is unclear why this does not affect mitochondrial proteins enough to activate the mitoUPR. A previous report also did not observe activation of the mitoUPR in response to heat stress [9]. It was surprising that osmotic stress did not activate any of the unfolded protein responses as these conditions are known to induce protein damage and aggregation [76]. It is possible that the UPR pathways do become activated at higher salt concentrations, but the salt concentration used here is sufficient to increase lifespan (Fig S19) and increased resistance to salt stress [37].

In addition to confirming that each stress responsive reporter was activated by the type of stress it was designed to detect, we also identified other stresses that could activate specific reporters. For example, we found that anoxia activated the HSR reporter *Phsp-16.2::GFP*. Perhaps most interestingly, we found that osmotic stress could activate the SKN-1-mediated oxidative stress response as measured by both the *Pgst-4::GFP* reporter and *Pgcs-1::GFP* reporter. SKN-1 has been shown to have a number of roles, including cellular stress response [13], but a role in osmotic stress resistance has not been reported. While SKN-1 was shown to be dispensable for the high osmotic stress resistance in *osm-11* mutants [77], it would be interesting to further explore the role of SKN-1 in protecting against osmotic stress.

### **Role of DAF-16 and HSF-1 in unfolded protein responses**

DAF-16 is a FOXO transcription factor [78, 79] that is activated in response to multiple stresses [17] and is required for the long-life and increased stress resistance of the insulin-IGF1 receptor mutant *daf-2* [31, 51, 80-82]. *daf-16* mutants have normal or mildly increased sensitivity to heat stress (Fig 7 and [49-52]), normal or increased sensitivity to oxidative stress [83-85], and a modestly decreased lifespan [80, 86, 87]. We found that although *daf-16* mutants are able to increase their thermotolerance in response to a mild heat stress as well as WT worms, the increased resistance to heat stress is rapidly lost with age. This indicates that DAF-16 is required to maintain induced thermotolerance.

Surprisingly, even though heat stress resistance was lost, the duration of *Phsp-16.2::GFP* reporter activation after mild heat stress in *daf-16* worms was equivalent to WT worms. This suggests that upregulation of *hsp-16.2* is not sufficient to maintain increased thermotolerance.

The heat shock transcription factor HSF-1 is activated in response to heat stress [1, 2] and is also required for the longevity of *daf-2* worms [88]. A homozygous deletion in exon 6 of in *hsf-1(ok600)* worms results in lethality, while the *hsf-1(sy441)* point mutant used in this study results in decreased lifespan [88, 89]. Although HSF-1 is crucial in mediating the HSR, *hsf-1* mutants exhibit normal sensitivity to heat stress (Fig 8 and [52]). This suggests that initial survival of heat stress is not dependent on activation of the HSR. In contrast, HSF-1 is required for induced thermotolerance, which is absent in *hsf-1* mutants (Fig 8 and [52]). This may be due to the reduced ability of *hsf-1* mutants to increase expression of heat shock proteins, such as HSP-16.2 (Fig 8 and [47, 53]), in response to mild heat stress. Interestingly, we also found that *hsf-1* mutants have a decreased activation of the mitoUPR in response to oxidative stress. Nonetheless, it has been shown that *hsf-1* mutants do not have decreased survival compared to WT worms under conditions of oxidative stress [90].

## Conclusions

Stress resistance declines with age for all types of stress that we measured with maximal stress resistance occurring during early adulthood. Since early adulthood is also the peak reproductive period for the worm, this suggests the possibility that there may be a genetic program in place to maintain worm survival until reproduction has occurred – an idea which is supported by recent evidence [21]. Our data indicates that after the worm's peak reproductive period, multiple stress responsive pathways are no longer able to respond to stress, and the ability to undergo hormesis is lost. As resistance to stress has been intimately linked to longevity [91-93], understanding the molecular underpinnings of the downregulation of stress responses with age may provide insights into improving health span.

## METHODS

**Strains and maintenance.** Stress resistance assays were performed on N2 wild-type worms obtained from the *Caenorhabditis* Genetics Center. Stress responsive reporter strains were crossed into the *daf-16(mu86)* and *hsf-1(sy441)* mutant background. Wild-type males were first crossed to the fluorescent reporter strain and males from the cross were mated with *daf-16* or *hsf-1* mutants.

After selfing, homozygous *daf-16* mutants were identified by PCR genotyping and homozygous *hsf-1* mutants were identified by DNA sequencing. See Supplemental Text for a full list of strains used in this study.

**Stress resistance assays.** For all stress resistance assays, we used at least 3 biological replicates with a minimum of 20 worms per replicate. In piloting these studies, we observed that multiple stresses caused internal hatching of progeny, especially oxidative stress. Since this has the potential to decrease survival independently of stress resistance during the reproductive period, we maintained worms on plates containing 25  $\mu$ M FUDR beginning at adulthood. This concentration of FUDR was previously shown to have minimal impact on longevity [56] and prevented internal hatching of progeny during the stress assays.

**Osmotic stress.** Resistance to osmotic stress was assessed by transferring worms to NGM plates containing 400-500 mM NaCl. Survival was monitored after 48 hours.

**Heat stress.** Heat stress resistance was measured by transferring worms to a new plate and placing the plate in a 37°C incubator. Survival was monitored hourly.

**Anoxia.** Resistance to anoxia was assessed using BD Bio-Bag Type A environmental chambers (Becton, Dickinson and Company, NJ) according to the manufacturer's instructions. Worms were transferred to 60 mm NGM plates and sealed in the bio-bags under anoxic conditions for 2 days. Worms were allowed to recover for one day before measuring survival.

**Oxidative stress.** Resistance to oxidative stress was assessed as previously described [94]. For the acute assay, worms were transferred to freshly prepared plates containing 240 or 300  $\mu$ M juglone and survival was monitored hourly. For the chronic assay, worms were transferred to plates containing 2 mM paraquat and survival was monitored daily. The 2 mM paraquat plates also contained 25  $\mu$ M FUDR to prevent paraquat-induced internal hatching of progeny [95].

**Bacterial pathogen stress.** We used two different assays to measure resistance to *Pseudomonas Aeruginosa*. Both assays were performed according to previously described protocols [19]. The bacterial toxin assay (referred to by Kirienko et al. as the fast kill assay) is thought to kill worms through the release of a diffusible toxin, while the bacterial ingestion assay (referred to by Kirienko et al. as the slow kill assay) is thought to act through over-colonization of the intestine.

Hormesis for heat stress resistance and lifespan. To induce heat stress hormesis, worms were transferred to NGM plates and placed in a 35°C incubator for 2 hours to cause a mild heat stress. For stress resistance assays, worms were allowed to recover at 20°C for 24 hours before testing resistance to heat stress. For lifespan assays, NGM plates were supplemented with 25 µM FUDR. Following the mild heat stress, the lifespan plates were transferred to a 20°C incubator and survival was monitored every other day. Worms that showed internal hatching of progeny or externalization of organs were censored. To test the ability of other stresses to increase lifespan we used the following conditions: osmotic stress – 200 mM or 300 mM NaCl for 1 day; oxidative stress – 0.15 mM paraquat for 2 days or 4 mM paraquat for 1 day; cold stress – 4°C for 1 day or 10°C for 2 days; hypoxia – 6 hours or 24 hours at 0.5% oxygen; starvation – 1 day or 3 days on NGM plates.

Exposing stress-responsive reporter strains to different types of stress. To determine which types of stresses could activate each stress reporter strain, we exposed each strain to different doses of stress and observed GFP intensity immediately following the stress and at 2, 4, 6, 24 and 48 hours following the stress. For heat stress, worms were exposed to either 30°C heat for 3 hours or 35°C heat for 2 hours. For cold stress, worms were incubated at 4°C for 24 hours. For osmotic stress, worms were transferred to plates containing 300 mM NaCl. For oxidative stress, worms were transferred to plates containing 0.2 mM paraquat, 4 mM paraquat or 180 µM juglone. For anoxia, worms were placed under condition of anoxia (as described above) for 24 hours. For starvation, worms were washed three times with M9 buffer and transferred to plates containing no food. For ER stress, worms were transferred to plates containing 5 µg/ml tunicamycin. For bacterial pathogen stress worms were transferred to plates containing *P. aeruginosa* as described for the fast kill assay.

Imaging and quantification of fluorescent reporter strains. For imaging, groups of 8 worms were picked to an unseeded NGM plate and immobilized using 20 mM sodium azide. Once immobilized worms were rapidly arranged and visualized using a Nikon SMZ1500 fluorescent microscope. Images were captured using an AVT Stingray F145B camera and VimbaViewer 1.1.2 software as previously described [96]. For quantification, images captured at the same magnification and same exposure time were combined using Adobe Photoshop into a single multi-panel image, which was opened using ImageJ software. Following subtraction of background, the multi-panel image containing all of the groups of worms to be compared was thresholded

together as one image to reflect fluorescence observed by observation. In general the threshold was set above the level of autofluorescence. In the case of the *Phsp16.2::GFP* and *Pnhr-57::GFP* reporter strains, there is negligible fluorescence without induction and autofluorescence becomes brighter than uninduced reporter fluorescence at later ages. Nonetheless, when induced the reporter fluorescence is brighter than autofluorescence even at day 10. The integrated density (pixel intensity \* area) of fluorescence was then measured for each worm individually.

Nuclear localization of DAF-16:GFP. DAF-16 activation was assessed by the nuclear localization of DAF-16:GFP in the strain TJ356 (*zIs356[Pdaf-16::daf-16a/b::GFP, rol-6(su1006)]*). The degree of nuclear localization was categorized as follows: cytoplasmic (no nuclear localization observed), partial nuclear (a small amount of DAF-16:GFP is observed in the nucleus, but most DAF-16:GFP is cytoplasmic), nuclear (DAF-16:GFP is clearly and primarily present in the nucleus, some DAF-16:GFP is observed in the cytoplasm), and full nuclear (all DAF-16:GFP is present in the nucleus).

Statistics. Differences between ages or time points for bar graphs was determined using one-way or two-way ANOVA followed by a Bonferroni post-test to assess differences between groups. Heat and oxidative stress assays involving multiple time points were assessed by repeated measures ANOVA. Survival plots for chronic oxidative stress assays and lifespan assays were assessed using a Log-rank test.

## ACKNOWLEDGEMENTS

We like to thank the Caenorhabditis Genetics Center (CGC) for providing the strains used in this manuscript. We would also like to thank the labs that generated the reporter strains and supplied them to the CGC.

## Funding

This work was supported by the Van Andel Research Institute, Van Andel Institute Graduate School and the Frederik and Lena Meijer Summer Internship Program.

## Conflict of interest statement

The authors declare no conflict of interest.

## REFERENCES

1. Cotto JJ and Morimoto RI. Stress-induced activation of the heat-shock response: cell and molecular biology of heat-shock factors. Biochemical Society symposium. 1999; 64:105-118.

2. Vabulas RM, Raychaudhuri S, Hayer-Hartl M and Hartl FU. Protein folding in the cytoplasm and the heat shock response. *Cold Spring Harbor perspectives in biology*. 2010; 2:a004390.
3. Link CD, Cypser JR, Johnson CJ and Johnson TE. Direct observation of stress response in *Caenorhabditis elegans* using a reporter transgene. *Cell Stress Chaperones*. 1999; 4:235-242.
4. Rea SL, Wu D, Cypser JR, Vaupel JW and Johnson TE. A stress-sensitive reporter predicts longevity in isogenic populations of *Caenorhabditis elegans*. *Nat Genet*. 2005; 37:894-898.
5. Haynes CM and Ron D. The mitochondrial UPR - protecting organelle protein homeostasis. *Journal of cell science*. 2010; 123:3849-3855.
6. Jovaisaite V, Mouchiroud L and Auwerx J. The mitochondrial unfolded protein response, a conserved stress response pathway with implications in health and disease. *The Journal of experimental biology*. 2014; 217:137-143.
7. Mori K. Signalling pathways in the unfolded protein response: development from yeast to mammals. *Journal of biochemistry*. 2009; 146:743-750.
8. Walter P and Ron D. The unfolded protein response: from stress pathway to homeostatic regulation. *Science*. 2011; 334:1081-1086.
9. Yoneda T, Benedetti C, Urano F, Clark SG, Harding HP and Ron D. Compartment-specific perturbation of protein handling activates genes encoding mitochondrial chaperones. *Journal of cell science*. 2004; 117:4055-4066.
10. Calfon M, Zeng H, Urano F, Till JH, Hubbard SR, Harding HP, Clark SG and Ron D. IRE1 couples endoplasmic reticulum load to secretory capacity by processing the XBP-1 mRNA. *Nature*. 2002; 415:92-96.
11. Powell-Coffman JA. Hypoxia signaling and resistance in *C. elegans*. *Trends in endocrinology and metabolism*. 2010; 21:435-440.
12. Shen C, Shao Z and Powell-Coffman JA. The *Caenorhabditis elegans* rhy-1 gene inhibits HIF-1 hypoxia-inducible factor activity in a negative feedback loop that does not include vhl-1. *Genetics*. 2006; 174:1205-1214.
13. Blackwell TK, Steinbaugh MJ, Hourihan JM, Ewald CY and Isik M. SKN-1/Nrf, stress responses, and aging in *Caenorhabditis elegans*. *Free Radic Biol Med*. 2015; 88:290-230.
14. Tullet JM, Hertweck M, An JH, Baker J, Hwang JY, Liu S, Oliveira RP, Baumeister R and Blackwell TK. Direct inhibition of the longevity-promoting factor SKN-1 by insulin-like signaling in *C. elegans*. *Cell*. 2008; 132:1025-1038.
15. Link CD and Johnson CJ. Reporter transgenes for study of oxidant stress in *Caenorhabditis elegans*. *Methods in enzymology*. 2002; 353:497-505.
16. Wang J, Robida-Stubbs S, Tullet JM, Rual JF, Vidal M and Blackwell TK. RNAi screening implicates a SKN-1-dependent transcriptional response in stress resistance and longevity deriving from translation inhibition. *PLoS Genet*. 2010; 6.
17. Henderson ST and Johnson TE. daf-16 integrates developmental and environmental inputs to mediate aging in the nematode *Caenorhabditis elegans*. *Curr Biol*. 2001; 11:1975-1980.
18. Libina N, Berman JR and Kenyon C. Tissue-specific activities of *C. elegans* DAF-16 in the regulation of lifespan. *Cell*. 2003; 115:489-502.
19. Kiriienko NV, Cezairliyan BO, Ausubel FM and Powell JR. *Pseudomonas aeruginosa* PA14 pathogenesis in *Caenorhabditis elegans*. *Methods in molecular biology*. 2014; 1149:653-669.
20. Kaeberlein TL, Smith ED, Tsuchiya M, Welton KL, Thomas JH, Fields S, Kennedy BK and Kaeberlein M. Lifespan extension in *Caenorhabditis elegans* by complete removal of food. *Aging Cell*. 2006; 5:487-494.
21. Youngman MJ, Rogers ZN and Kim DH. A decline in p38 MAPK signaling underlies immunosenescence in *Caenorhabditis elegans*. *PLoS Genet*. 2011; 7:e1002082.
22. Runkel ED, Liu S, Baumeister R and Schulze E. Surveillance-activated defenses block the ROS-induced mitochondrial unfolded protein response. *PLoS Genet*. 2013; 9:e1003346.
23. Henis-Korenblit S, Zhang P, Hansen M, McCormick M, Lee SJ, Cary M and Kenyon C. Insulin/IGF-1 signaling mutants reprogram ER stress response regulators to promote longevity. *Proc Natl Acad Sci U S A*. 2010; 107:9730-9735.
24. An JH and Blackwell TK. SKN-1 links *C. elegans* mesendodermal specification to a conserved oxidative stress response. *Genes Dev*. 2003; 17:1882-1893.
25. Hoeven R, McCallum KC, Cruz MR and Garsin DA. Ce-Duox1/BLI-3 generated reactive oxygen species trigger protective SKN-1 activity via p38 MAPK signaling during infection in *C. elegans*. *PLoS Pathog*. 2011; 7:e1002453.
26. Lee SJ, Hwang AB and Kenyon C. Inhibition of respiration extends *C. elegans* life span via reactive oxygen species that increase HIF-1 activity. *Curr Biol*. 2010; 20:2131-2136.
27. Padmanabha D, Padilla PA, You YJ and Baker KD. A HIF-independent mediator of transcriptional responses to oxygen deprivation in *Caenorhabditis elegans*. *Genetics*. 2015; 199:739-748.
28. Ghose P, Park EC, Tabakin A, Salazar-Vasquez N and Rongo C. Anoxia-reoxygenation regulates mitochondrial dynamics through the hypoxia response pathway, SKN-1/Nrf, and stomatin-like protein STL-1/SLP-2. *PLoS Genet*. 2013; 9:e1004063.
29. Essers MA, de Vries-Smits LM, Barker N, Polderman PE, Burgering BM and Korswagen HC. Functional interaction between beta-catenin and FOXO in oxidative stress signaling. *Science*. 2005; 308:1181-1184.
30. Sanchez-Blanco A and Kim SK. Variable pathogenicity determines individual lifespan in *Caenorhabditis elegans*. *PLoS Genet*. 2011; 7:e1002047.
31. Lithgow GJ, White TM, Melov S and Johnson TE. Thermotolerance and extended life-span conferred by single-gene mutations and induced by thermal stress. *Proc Natl Acad Sci U S A*. 1995; 92:7540-7544.
32. Yashin AI, Cypser JR, Johnson TE, Michalski AI, Boyko SI and Novoseltsev VN. Ageing and survival after different doses of heat shock: the results of analysis of data from stress experiments with the nematode worm *Caenorhabditis elegans*. *Mech Ageing Dev*. 2001; 122:1477-1495.
33. Cypser JR and Johnson TE. Multiple stressors in *Caenorhabditis elegans* induce stress hormesis and extended longevity. *J Gerontol A Biol Sci Med Sci*. 2002; 57:B109-114.
34. Olsen A, Vantipalli MC and Lithgow GJ. Lifespan extension of *Caenorhabditis elegans* following repeated mild hormetic heat treatments. *Biogerontology*. 2006; 7:221-230.
35. Wu D, Cypser JR, Yashin AI and Johnson TE. Multiple mild heat-shocks decrease the Gompertz component of mortality in *Caenorhabditis elegans*. *Exp Gerontol*. 2009; 44:607-612.
36. Przybysz AJ, Choe KP, Roberts LJ and Strange K. Increased age reduces DAF-16 and SKN-1 signaling and the hormetic response of *Caenorhabditis elegans* to the xenobiotic juglone. *Mech Ageing Dev*. 2009; 130:357-369.



37. Lamitina ST, Morrison R, Moeckel GW and Strange K. Adaptation of the nematode *Caenorhabditis elegans* to extreme osmotic stress. *Am J Physiol Cell Physiol*. 2004; 286:C785-791.
38. Dasgupta N, Patel AM, Scott BA and Crowder CM. Hypoxic preconditioning requires the apoptosis protein CED-4 in *C. elegans*. *Curr Biol*. 2007; 17:1954-1959.
39. Fawcett EM, Hoyt JM, Johnson JK and Miller DL. Hypoxia disrupts proteostasis in *Caenorhabditis elegans*. *Aging Cell*. 2015; 14:92-101.
40. Murray P, Hayward SA, Govan GG, Gracey AY and Cossins AR. An explicit test of the phospholipid saturation hypothesis of acquired cold tolerance in *Caenorhabditis elegans*. *Proc Natl Acad Sci U S A*. 2007; 104:5489-5494.
41. Yang W and Hekimi S. A mitochondrial superoxide signal triggers increased longevity in *Caenorhabditis elegans*. *PLoS Biol*. 2010; 8:e1000556.
42. Van Raamsdonk JM and Hekimi S. Superoxide dismutase is dispensable for normal animal lifespan. *Proc Natl Acad Sci U S A*. 2012; 109:5785-5790.
43. Heidler T, Hartwig K, Daniel H and Wenzel U. *Caenorhabditis elegans* lifespan extension caused by treatment with an orally active ROS-generator is dependent on DAF-16 and SIR-2.1. *Biogerontology*. 2010; 11:183-195.
44. Hwang AB, Ryu EA, Artan M, Chang HW, Kabir MH, Nam HJ, Lee D, Yang JS, Kim S, Mair WB, Lee C, Lee SS and Lee SJ. Feedback regulation via AMPK and HIF-1 mediates ROS-dependent longevity in *Caenorhabditis elegans*. *Proc Natl Acad Sci U S A*. 2014; 111:E4458-4467.
45. Cypser JR, Tedesco P and Johnson TE. Hormesis and aging in *Caenorhabditis elegans*. *Exp Gerontol*. 2006; 41:935-939.
46. Chen AT, Guo C, Itani OA, Budaitis BG, Williams TW, Hopkins CE, McEachin RC, Pande M, Grant AR, Yoshina S, Mitani S and Hu PJ. Longevity Genes Revealed by Integrative Analysis of Isoform-Specific daf-16/FoxO Mutants of *Caenorhabditis elegans*. *Genetics*. 2015; 201:613-629.
47. Morton EA and Lamitina T. *Caenorhabditis elegans* HSF-1 is an essential nuclear protein that forms stress granule-like structures following heat shock. *Aging Cell*. 2013; 12:112-120.
48. Singh V and Aballay A. Heat-shock transcription factor (HSF)-1 pathway required for *Caenorhabditis elegans* immunity. *Proc Natl Acad Sci U S A*. 2006; 103:13092-13097.
49. Song HO, Lee W, An K, Lee HS, Cho JH, Park ZY and Ahnn J. C. *elegans* STI-1, the homolog of Stt1/Hop, is involved in aging and stress response. *Journal of molecular biology*. 2009; 390:604-617.
50. Buchter C, Ackermann D, Havermann S, Honnen S, Chovolou Y, Fritz G, Kampkotter A and Watjen W. Myricetin-mediated lifespan extension in *Caenorhabditis elegans* is modulated by DAF-16. *International journal of molecular sciences*. 2013; 14:11895-11914.
51. Warnhoff K, Murphy JT, Kumar S, Schneider DL, Peterson M, Hsu S, Guthrie J, Robertson JD and Kornfeld K. The DAF-16 FOXO transcription factor regulates *natc-1* to modulate stress resistance in *Caenorhabditis elegans*, linking insulin/IGF-1 signaling to protein N-terminal acetylation. *PLoS Genet*. 2014; 10:e1004703.
52. McColl G, Rogers AN, Alavez S, Hubbard AE, Melov S, Link CD, Bush AI, Kapahi P and Lithgow GJ. Insulin-like signaling determines survival during stress via posttranscriptional mechanisms in *C. elegans*. *Cell Metab*. 2010; 12:260-272.
53. Hajdu-Cronin YM, Chen WJ and Sternberg PW. The L-type cyclin CYL-1 and the heat-shock-factor HSF-1 are required for heat-shock-induced protein expression in *Caenorhabditis elegans*. *Genetics*. 2004; 168:1937-1949.
54. Smith ED, Kaeberlein TL, Lydum BT, Sager J, Welton KL, Kennedy BK and Kaeberlein M. Age- and calorie-independent life span extension from dietary restriction by bacterial deprivation in *Caenorhabditis elegans*. *BMC developmental biology*. 2008; 8:49.
55. Bansal A, Zhu LJ, Yen K and Tissenbaum HA. Uncoupling lifespan and healthspan in *Caenorhabditis elegans* longevity mutants. *Proc Natl Acad Sci U S A*. 2015; 112:E277-286.
56. Van Raamsdonk JM and Hekimi S. FUDR causes a twofold increase in the lifespan of the mitochondrial mutant gas-1. *Mech Ageing Dev*. 2011; 132:519-521.
57. Hartwig K, Heidler T, Moch J, Daniel H and Wenzel U. Feeding a ROS-generator to *Caenorhabditis elegans* leads to increased expression of small heat shock protein HSP-16.2 and hormesis. *Genes & nutrition*. 2009; 4:59-67.
58. Li WH, Shi YC, Chang CH, Huang CW and Hsiu-Chuan Liao V. Selenite protects *Caenorhabditis elegans* from oxidative stress via DAF-16 and TRXR-1. *Molecular nutrition & food research*. 2014; 58:863-874.
59. Kimura K, Tanaka N, Nakamura N, Takano S and Ohkuma S. Knockdown of mitochondrial heat shock protein 70 promotes progeria-like phenotypes in *caenorhabditis elegans*. *J Biol Chem*. 2007; 282:5910-5918.
60. Harman D. Aging: a theory based on free radical and radiation chemistry. *Journal of gerontology*. 1956; 11:298-300.
61. Labbadia J and Morimoto RI. The biology of protostasis in aging and disease. *Annual review of biochemistry*. 2015; 84:435-464.
62. Perez VI, Bokov A, Van Remmen H, Mele J, Ran Q, Ikeno Y and Richardson A. Is the oxidative stress theory of aging dead? *Biochimica et biophysica acta*. 2009; 1790:1005-1014.
63. Van Raamsdonk JM and Hekimi S. Reactive Oxygen Species and Aging in *Caenorhabditis elegans*: Causal or Casual Relationship? *Antioxid Redox Signal*. 2010; 13:1911-1953.
64. Ristow M and Schmeisser S. Extending life span by increasing oxidative stress. *Free Radic Biol Med*. 2011; 51:327-336.
65. Hekimi S, Lapointe J and Wen Y. Taking a "good" look at free radicals in the aging process. *Trends Cell Biol*. 2011; 21:569-576.
66. Back P, Braeckman BP and Matthijsens F. ROS in aging *Caenorhabditis elegans*: damage or signaling? *Oxid Med Cell Longev*. 2012; 2012:608478.
67. Gems D and Partridge L. Genetics of longevity in model organisms: debates and paradigm shifts. *Annual review of physiology*. 2013; 75:621-644.
68. Blagosklonny MV. Aging: ROS or TOR. *Cell cycle*. 2008; 7:3344-3354.
69. Gems D and de la Guardia Y. Alternative Perspectives on Aging in *Caenorhabditis elegans*: Reactive Oxygen Species or Hyperfunction? *Antioxid Redox Signal*. 2013; 19:321-329.
70. Blagosklonny MV. Aging and immortality: quasi-programmed senescence and its pharmacologic inhibition. *Cell cycle*. 2006; 5:2087-2102.
71. Blagosklonny MV and Hall MN. Growth and aging: a common molecular mechanism. *Aging (Albany NY)*. 2009; 1:357-362. doi: 10.18632/aging.100040.

- 72.** Blagosklonny MV. Answering the ultimate question "what is the proximal cause of aging?". *Aging* (Albany NY). 2012; 4:861-877. doi: 10.18632/aging.100525.
- 73.** Blagosklonny MV. Paradoxes of aging. *Cell cycle*. 2007; 6:2997-3003.
- 74.** Miller RA, Harper JM, Galecki A and Burke DT. Big mice die young: early life body weight predicts longevity in genetically heterogeneous mice. *Aging Cell*. 2002; 1:22-29.
- 75.** Blagosklonny MV. Big mice die young but large animals live longer. *Aging* (Albany NY). 2013; 5:227-233. doi: 10.18632/aging.100551.
- 76.** Burkewitz K, Choe K and Strange K. Hypertonic stress induces rapid and widespread protein damage in *C. elegans*. *Am J Physiol Cell Physiol*. 2011; 301:C566-576.
- 77.** Dresen A, Finkbeiner S, Dottermusch M, Beume JS, Li Y, Walz G and Neumann-Haefelin E. *Caenorhabditis elegans* OSM-11 signaling regulates SKN-1/Nrf during embryonic development and adult longevity and stress response. *Developmental biology*. 2015; 400:118-131.
- 78.** Ogg S, Paradis S, Gottlieb S, Patterson GI, Lee L, Tissenbaum HA and Ruvkun G. The Fork head transcription factor DAF-16 transduces insulin-like metabolic and longevity signals in *C. elegans*. *Nature*. 1997; 389:994-999.
- 79.** Lin K, Dorman JB, Rodan A and Kenyon C. daf-16: An HNF-3/forkhead family member that can function to double the life-span of *Caenorhabditis elegans*. *Science*. 1997; 278:1319-1322.
- 80.** Kenyon C, Chang J, Gensch E, Rudner A and Tabtiang R. A *C. elegans* mutant that lives twice as long as wild type. *Nature*. 1993; 366:461-464.
- 81.** Lamitina ST and Strange K. Transcriptional targets of DAF-16 insulin signaling pathway protect *C. elegans* from extreme hypertonic stress. *Am J Physiol Cell Physiol*. 2005; 288:C467-474.
- 82.** Scott BA, Avidan MS and Crowder CM. Regulation of hypoxic death in *C. elegans* by the insulin/IGF receptor homolog DAF-2. *Science*. 2002; 296:2388-2391.
- 83.** Honda Y and Honda S. The daf-2 gene network for longevity regulates oxidative stress resistance and Mn-superoxide dismutase gene expression in *Caenorhabditis elegans*. *Faseb J*. 1999; 13:1385-1393.
- 84.** Volovik Y, Moll L, Marques FC, Maman M, Bejerano-Sagie M and Cohen E. Differential regulation of the heat shock factor 1 and DAF-16 by neuronal nhl-1 in the nematode *C. elegans*. *Cell reports*. 2014; 9:2192-2205.
- 85.** Yanase S, Yasuda K and Ishii N. Adaptive responses to oxidative damage in three mutants of *Caenorhabditis elegans* (age-1, mev-1 and daf-16) that affect life span. *Mech Ageing Dev*. 2002; 123:1579-1587.
- 86.** Greer EL and Brunet A. Different dietary restriction regimens extend lifespan by both independent and overlapping genetic pathways in *C. elegans*. *Aging Cell*. 2009; 8:113-127.
- 87.** Lin K, Hsin H, Libina N and Kenyon C. Regulation of the *Caenorhabditis elegans* longevity protein DAF-16 by insulin/IGF-1 and germline signaling. *Nat Genet*. 2001; 28:139-145.
- 88.** Hsu AL, Murphy CT and Kenyon C. Regulation of aging and age-related disease by DAF-16 and heat-shock factor. *Science*. 2003; 300:1142-1145.
- 89.** Seo K, Choi E, Lee D, Jeong DE, Jang SK and Lee SJ. Heat shock factor 1 mediates the longevity conferred by inhibition of TOR and insulin/IGF-1 signaling pathways in *C. elegans*. *Aging Cell*. 2013; 12:1073-1081.
- 90.** Canuelo A, Gilbert-Lopez B, Pacheco-Linan P, Martinez-Lara E, Siles E and Miranda-Vizuete A. Tyrosol, a main phenol present in extra virgin olive oil, increases lifespan and stress resistance in *Caenorhabditis elegans*. *Mech Ageing Dev*. 2012; 133:563-574.
- 91.** Johnson TE, Cypser J, de Castro E, de Castro S, Henderson S, Murakami S, Rikke B, Tedesco P and Link C. Gerontogenes mediate health and longevity in nematodes through increasing resistance to environmental toxins and stressors. *Exp Gerontol*. 2000; 35:687-694.
- 92.** Lithgow GJ and Walker GA. Stress resistance as a determinate of *C. elegans* lifespan. *Mech Ageing Dev*. 2002; 123:765-771.
- 93.** Miller RA. Cell stress and aging: new emphasis on multiplex resistance mechanisms. *J Gerontol A Biol Sci Med Sci*. 2009; 64:179-182.
- 94.** Van Raamsdonk JM, Meng Y, Camp D, Yang W, Jia X, Benard C and Hekimi S. Decreased energy metabolism extends life span in *Caenorhabditis elegans* without reducing oxidative damage. *Genetics*. 2010; 185:559-571.
- 95.** Van Raamsdonk JM and Hekimi S. Deletion of the mitochondrial superoxide dismutase sod-2 extends lifespan in *Caenorhabditis elegans*. *PLoS Genet*. 2009; 5:e1000361.
- 96.** Schaar CE, Dues DJ, Spielbauer KK, Machiela E, Cooper JF, Senchuk M, Hekimi S and Van Raamsdonk JM. Mitochondrial and cytoplasmic ROS have opposing effects on lifespan. *PLoS genetics*. 2015; 11:e1004972.

## **SUPPLEMENTAL MATERIALS**

Please browse Full text version to check Supplemental Materials. Supplemental Materials include Supplemental Text and Supplemental Figure S1-S29 as a single combined PDF document.
